# Supplementary material for: SARS-CoV-2 IgG Antibodies Seroprevalence and Sera Neutralizing Activity in MEXICO: A National Cross-Sectional Study during 2020
Source: MDPI journal article supplement (doi:10.3390/microorganisms9040850), 2021-04-15
Supplement: s1 [file s1]

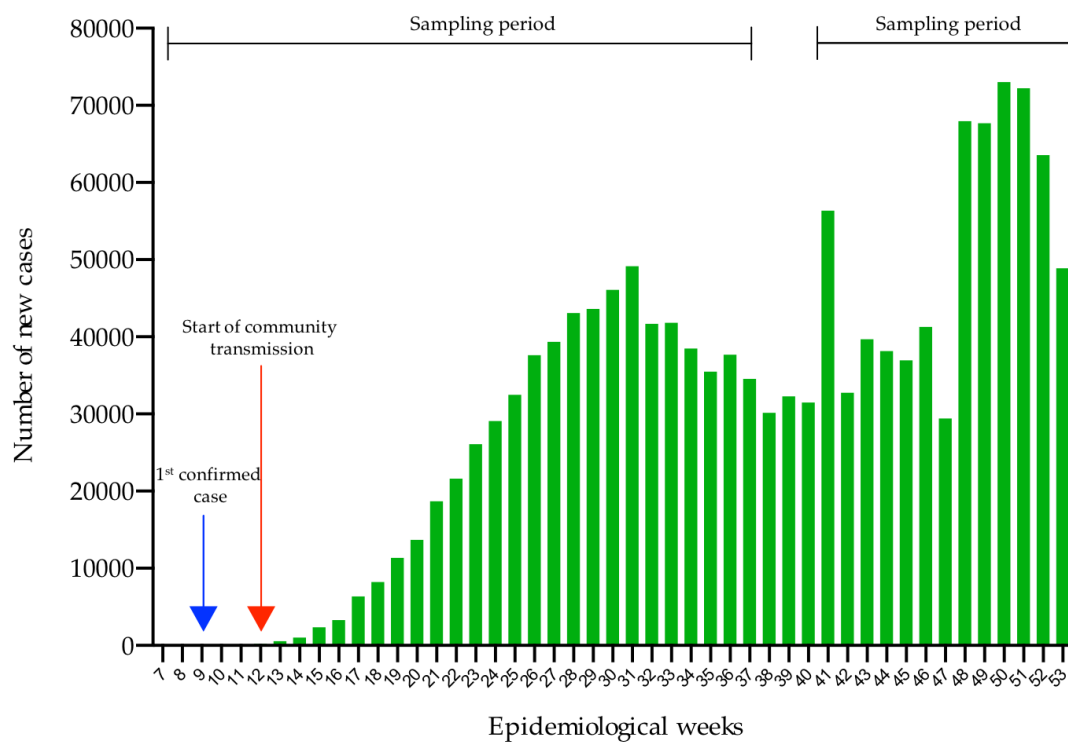

**Figure S1.** Periods used for sampling. Accessed 19/03/2021, from: [https://www.gob.mx/cms/uploads/attachment/file/603816/Comunicado\\_Tecnico\\_Diario\\_COVID-19\\_2020.12.31.pdf](https://www.gob.mx/cms/uploads/attachment/file/603816/Comunicado_Tecnico_Diario_COVID-19_2020.12.31.pdf).
