# Supplementary material for: SARS-CoV-2 IgG Antibodies Seroprevalence and Sera Neutralizing Activity in MEXICO: A National Cross-Sectional Study during 2020
Source: MDPI journal article supplement (doi:10.3390/microorganisms9040850), 2021-04-15
Supplement: s1 [file s1]

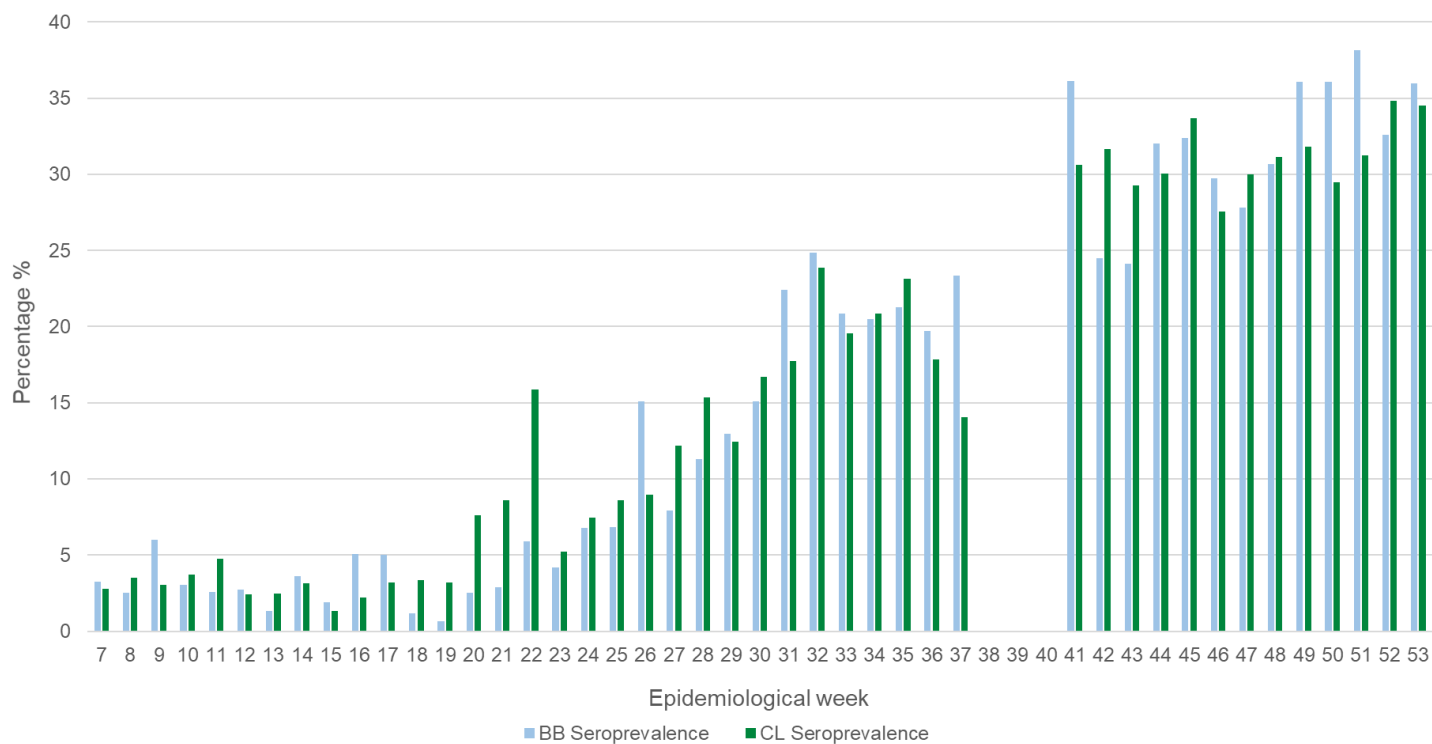

**Figure S2.** Comparison of the results from both the overall seroprevalences and those for each of the 44 weeks were compared between CLs and BBs.
