# Supplementary material for: SARS-CoV-2 IgG Antibodies Seroprevalence and Sera Neutralizing Activity in MEXICO: A National Cross-Sectional Study during 2020
Source: MDPI journal article supplement (doi:10.3390/microorganisms9040850), 2021-04-15
Supplement: s1 [file s1]

**Table S1.** Sampling scheme during the period under study.

| Clinical laboratory samples |                                       |       |       |       |        |       |
|-----------------------------|---------------------------------------|-------|-------|-------|--------|-------|
| Age group (years)           | 0-20                                  | 21-40 | 41-60 | 61-80 | 81-100 | Total |
| Number of samples           | 4                                     | 4     | 4     | 4     | 4      | 20    |
| Volume required             | 1mL                                   |       |       |       |        |       |
| Shipping frequency          | Weekly                                |       |       |       |        |       |
| Sampling period             | From February 10 to December 31, 2020 |       |       |       |        |       |
| Blood bank samples          |                                       |       |       |       |        |       |
| Age group (years)           | 20-40                                 |       | 41-60 |       |        | Total |
| Number of samples           | 6                                     |       | 6     |       |        | 12    |
| Volume required             | 1mL                                   |       |       |       |        |       |
| Shipping frequency          | Weekly                                |       |       |       |        |       |
| Sampling period             | From February 10 to December 31, 2020 |       |       |       |        |       |
| Total per week by state     |                                       |       |       |       |        | 32    |
